# Supplementary material for: Pregnancy Rates after Hysteroscopic Endometrial Polypectomy versus Endometrial Curettage Polypectomy: A Retrospective Study
Source: MDPI journal article supplement (doi:10.3390/medicina59101868), 2023-10-20
Supplement: s1 [file s1]

#### Veeck Classification

| G1                                                                                | G2                                                                                | G3a                                                                               | G3b                                                                                 | G4                                                                                  | G5                                                                                  |
|-----------------------------------------------------------------------------------|-----------------------------------------------------------------------------------|-----------------------------------------------------------------------------------|-------------------------------------------------------------------------------------|-------------------------------------------------------------------------------------|-------------------------------------------------------------------------------------|
|  |  |  |  |  |  |
| Blastomere: equality<br>Fragment: No                                              | Blastomere: equality<br>Fragment: A little                                        | Blastomere: inequality<br>Fragment: No                                            | Blastomere: inequality<br>Fragment: A little                                        | Blastomere: inequality<br>Fragment: Numerous                                        | Fragment:<br>More than half                                                         |

#### Gardner Classification

| 1. an early blastocyst                                                            | 2. a blastocyst                                                                   | 3. a full blastocyst                                                              | 4. an expanded blastocyst                                                           | 5. a hatching blastocyst                                                            | 6. a hatched blastocyst                                                             |
|-----------------------------------------------------------------------------------|-----------------------------------------------------------------------------------|-----------------------------------------------------------------------------------|-------------------------------------------------------------------------------------|-------------------------------------------------------------------------------------|-------------------------------------------------------------------------------------|
|  |  |  |  |  |  |
| Trophectoderm                                                                     | A: many cells forming a cohesive epithelium                                       |                                                                                   | B: few cells forming a loose epithelium                                             |                                                                                     | C: very few large cells                                                             |
| Inner Cell Mass                                                                   | A: tightly packed, many cells                                                     |                                                                                   | B: loosely grouped, several cells                                                   |                                                                                     | C: very few cells                                                                   |

**Figure S1.** Veeck and Gardner classifications. Veeck Classification: Grading is performed based on the blastomeres' uniformity and the amount of fragments, as shown in the figure. Gardner classification: The percentage of blastocyst formation is determined, and each blastocyst is assigned a score using this classification. Briefly, blastocysts were given a numerical score from 1 to 6 based on their degree of expansion and hatching status, as follows: 1, an early blastocyst with a blastocoel that is less than half of the embryo's volume; 2, a blastocyst with a blastocoel that is half of or greater than half of the embryo's volume; 3, a full blastocyst with a blastocoel that is filling the embryo; 4, an expanded blastocyst with a blastocoel volume larger than that of the early embryo, with a thinning zona; 5, a hatching blastocyst with the trophoblast starting to herniate through the zona; and 6, a hatched blastocyst, where the blastocyst has completely escaped from the zona. For blastocysts graded as 3–6 (i.e., full blastocysts onward), the inner cell mass development was assessed as follows: A, tightly packed, many cells; B, loosely grouped, several cells; or C, very few cells. The trophoblast was assessed as follows: A, many cells forming a cohesive epithelium; B, few cells forming a loose epithelium; or C, very few large cells.

**Table S1.** Study of the effect of age on pregnancy, live birth, and miscarriage rates in each of the outcomes of single blastocyst transfer.

| <b>Data Basis</b>                                  | <b>Pregnancy+</b>                   | <b>Pregnancy-</b>                      | <b>SMD</b> |
|----------------------------------------------------|-------------------------------------|----------------------------------------|------------|
| Age of cases at first embryo transfer              | 34.6                                | 36.6                                   | 0.459      |
| Age of cases with embryo transfer up to the second | 34.6                                | 37.6                                   | 0.729      |
| <b>Data Basis</b>                                  | <b>Live birth acquisition cases</b> | <b>No live birth acquisition cases</b> | <b>SMD</b> |
| Age of cases with embryo transfer up to the second | 34.0                                | 37.3                                   | 0.846      |
| <b>Data Basis</b>                                  | <b>Miscarriage case</b>             | <b>No miscarriage cases</b>            | <b>SMD</b> |
| Age of cases with embryo transfer up to the second | 36.8                                | 35.2                                   | -0.328     |

SMD (Standardized Mean Difference) of age in single blastocyst transfer cases.
